# Supplementary material for: Enhancement of photocatalytic H2 production by metal complex electrostatic adsorption on TiO2 (B) nanosheets
Source: Royal Society of Chemistry journal article supplement (doi:10.1039/c8ta10421b), 2019-01-01
Supplement: c8ta10421b1.pdf [file c8ta10421b1.pdf]

**Electronic Supporting Information for**

**Enhancement of photocatalytic H<sub>2</sub> production by metal complex  
electrostatic adsorption on TiO<sub>2</sub> (B) nanosheets**

Xiangchen Kong,<sup>a</sup> Zhonghui Gao,<sup>\*b</sup> Yue Gong,<sup>a</sup> Huiming Huang,<sup>a</sup> Haifeng Wang,<sup>b</sup> Porun Liu,<sup>c</sup> Huajie Yin,<sup>c</sup>

Zhenduo Cui,<sup>a</sup> Zhaoyang Li,<sup>a</sup> Yanqin Liang,<sup>a</sup> Shengli Zhu,<sup>\*a</sup> Yunhui Huang<sup>\*b</sup> and Xianjin Yang<sup>a</sup>

---

<sup>a.</sup> *School of Materials Science and Engineering, Tianjin University, Tianjin 300350, China.*

<sup>b.</sup> *School of Materials Science and Engineering, Tongji University, Shanghai 201804, China.*

<sup>c.</sup> *Centre for Clean Environment and Energy, Gold Coast Campus, Griffith University, Queensland 4222, Australia.*

**Corresponding Author**

\*SLZ: [slzhu@tju.edu.cn](mailto:slzhu@tju.edu.cn)

\*ZHG: [gzh05080201@163.com](mailto:gzh05080201@163.com)

\*YHH: [huangyh@tongji.edu.cn](mailto:huangyh@tongji.edu.cn)

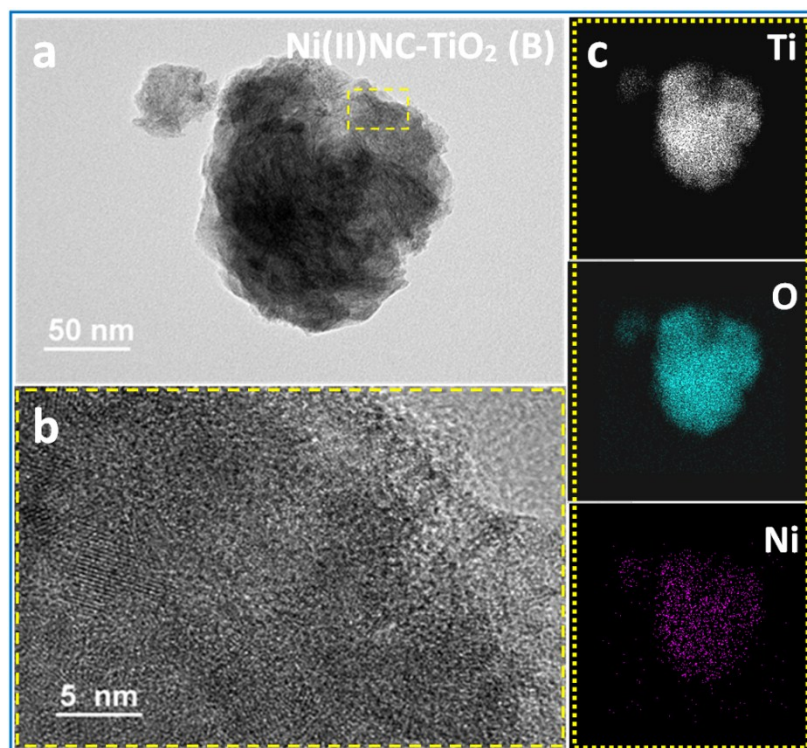

Figure S1. Structure characterizations of as-synthesized Ni(II)NC-TiO<sub>2</sub> (B) nanosheets. (a-b) TEM, HRTEM images of Ni(II)NC-TiO<sub>2</sub> (B); (c) the overlay mapping elements of Ti, O and Ni.

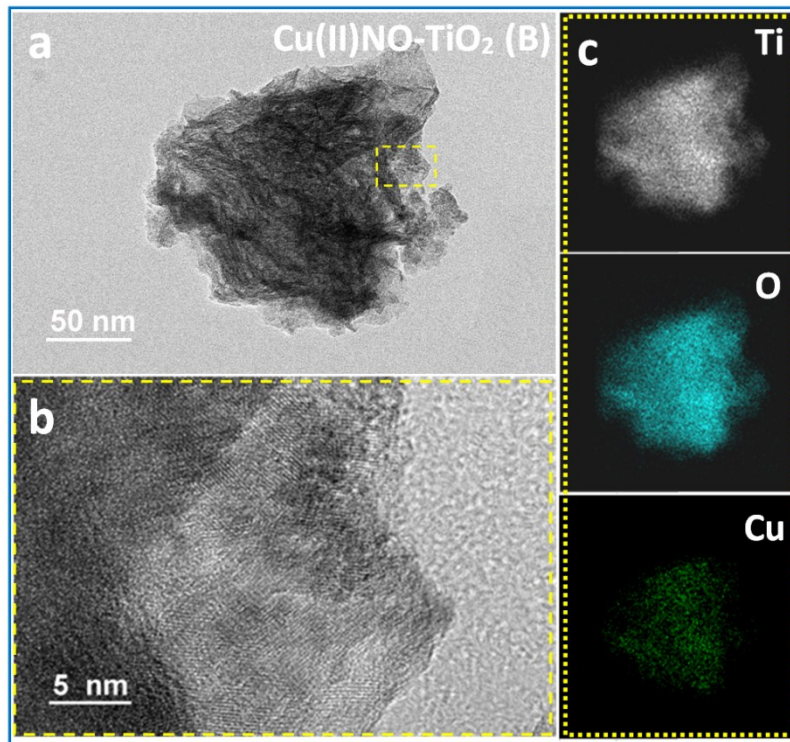

Figure S2. Structure characterizations of as-synthesized Cu(II)NO-TiO<sub>2</sub> (B) nanosheets. (a-b) TEM, HRTEM images of Cu(II)NO-TiO<sub>2</sub> (B); (c) the overlay mapping elements of Ti, O and Cu.

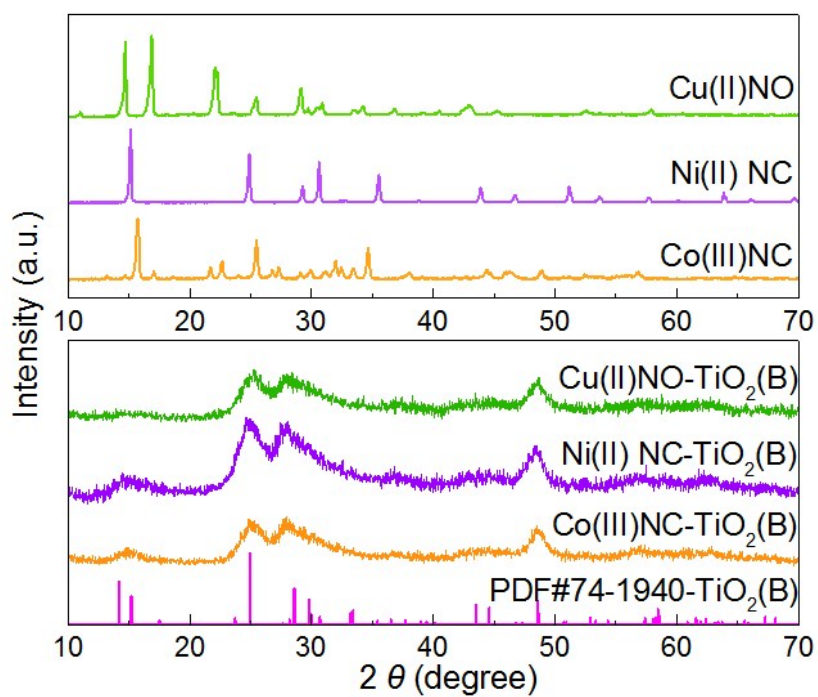

Figure S3. XRD patterns of the Co(III)NC, Ni(II)NC and Cu(II)NO metal complexes, and Co(III)NC/Ni(II)NC/Cu(II)NO-TiO<sub>2</sub>(B) nanosheets by electrostatic adsorption.

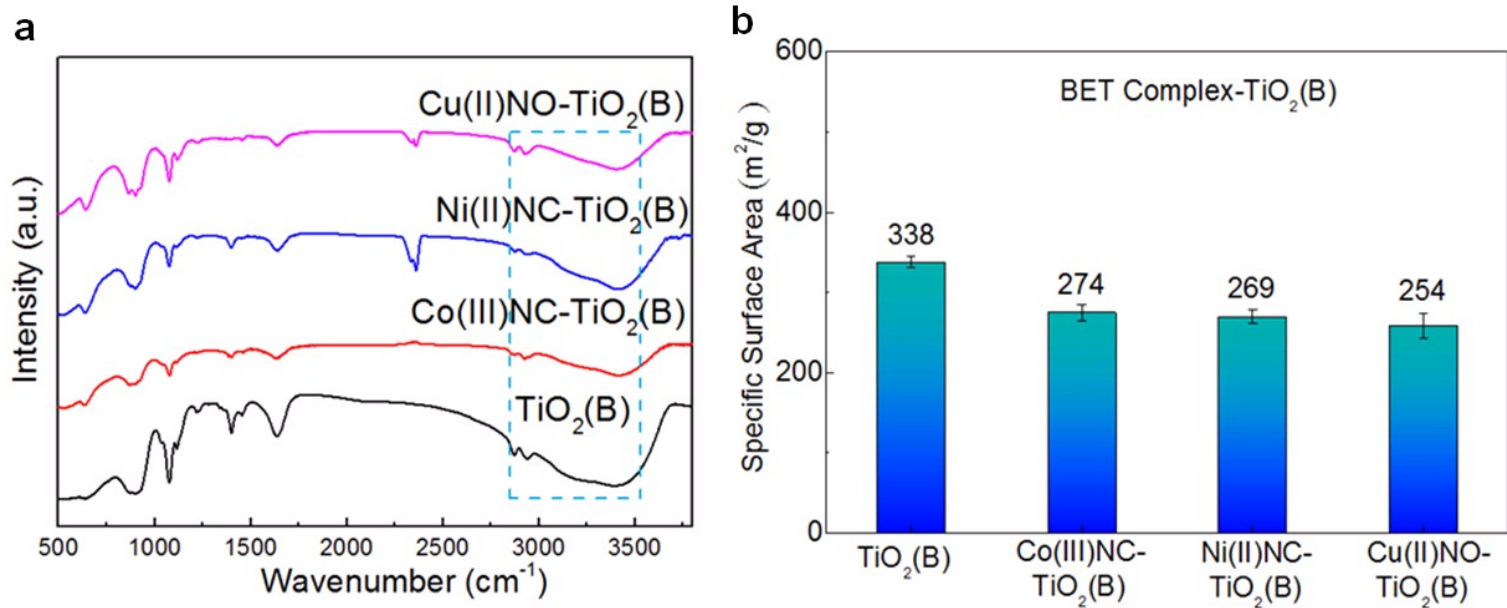

Figure S4.(a) FTIR and (b) BET of the pristine TiO<sub>2</sub> (B) and Co(III)NC/Ni(II)NC/Cu(II)NO-TiO<sub>2</sub> (B) nanosheets by electrostatic adsorption.

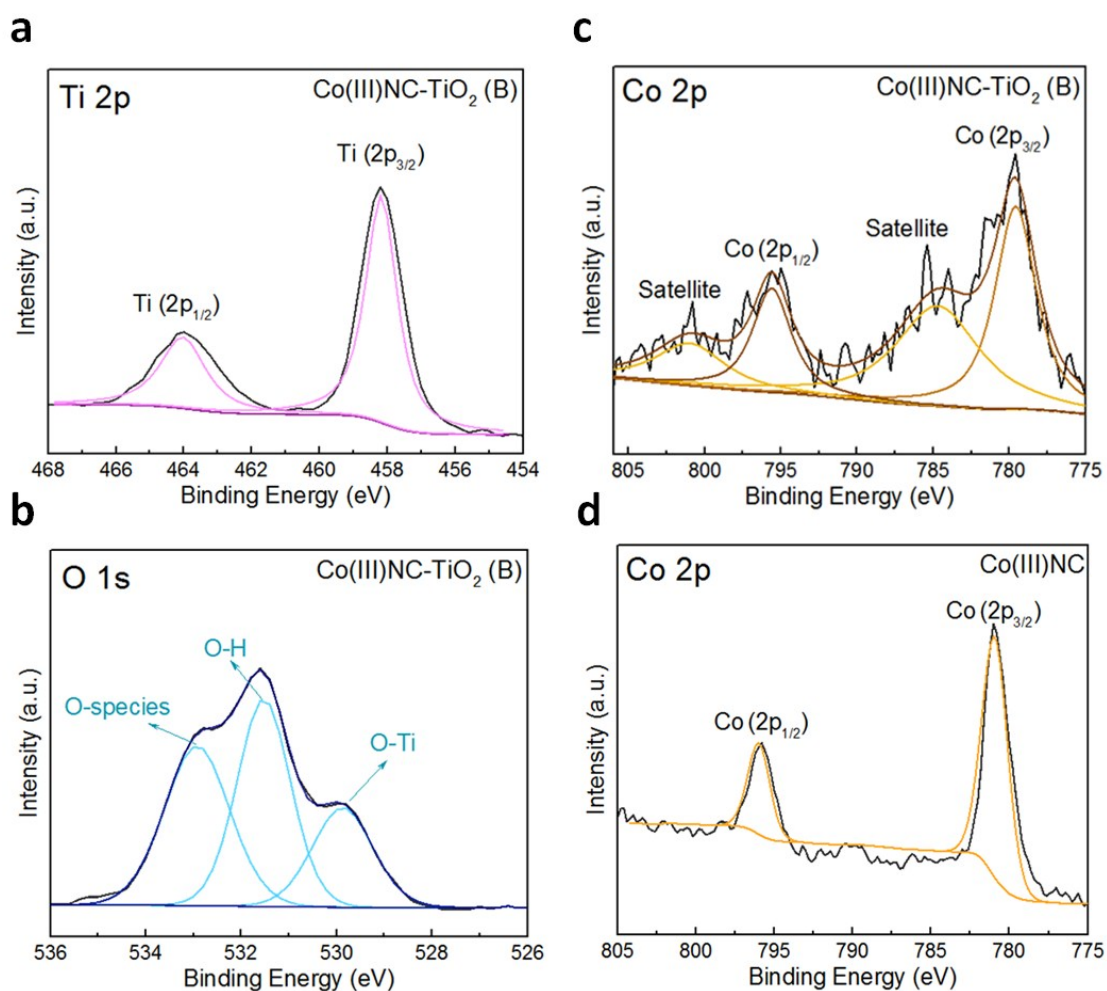

Figure S5. XPS spectra of (a) Ti 2p, (b) O 1s and (c) Co 2p region of Co(II)NC-TiO<sub>2</sub> (B); (d) Co 2p spectra of pristine Co(II)NC.

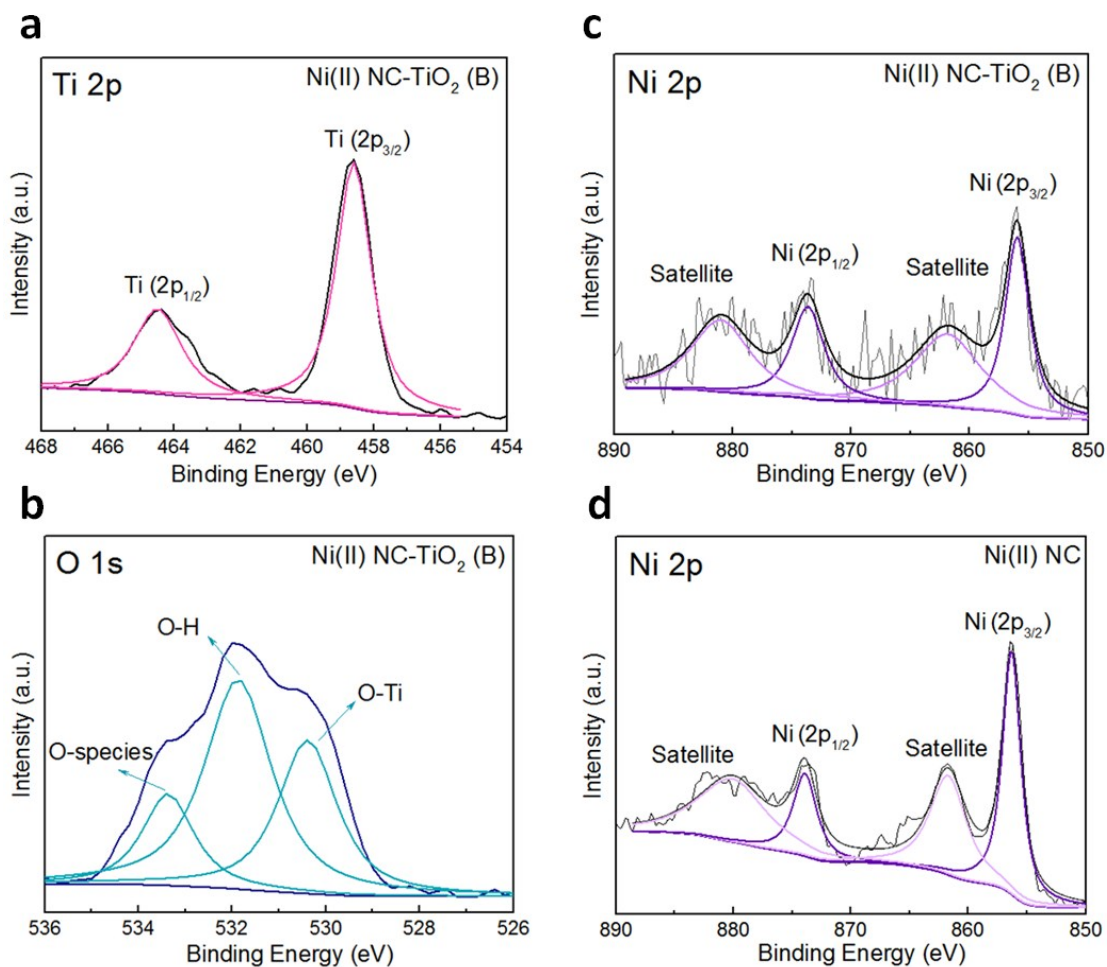

Figure S6. XPS spectra of (a) Ti 2p, (b) O 1s and (c) Ni 2p region of Ni(II)NC-TiO<sub>2</sub> (B); (d) Ni 2p spectra of pristine Ni(II)NC.

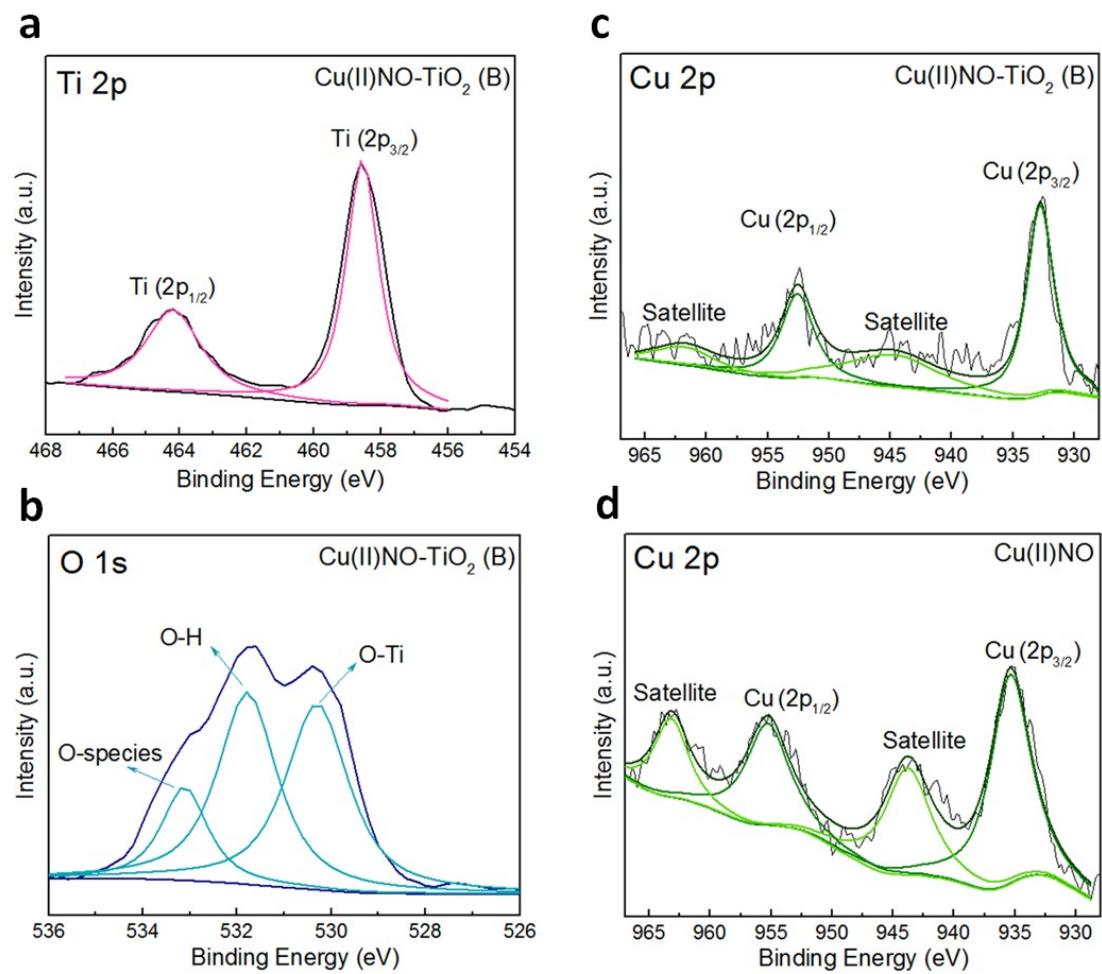

Figure S7. XPS spectra of (a) Ti 2p, (b) O 1s and (c) Cu 2p region of Cu(II)NO-TiO<sub>2</sub> (B); (d) Cu 2p spectra of pristine Cu(II)NO.



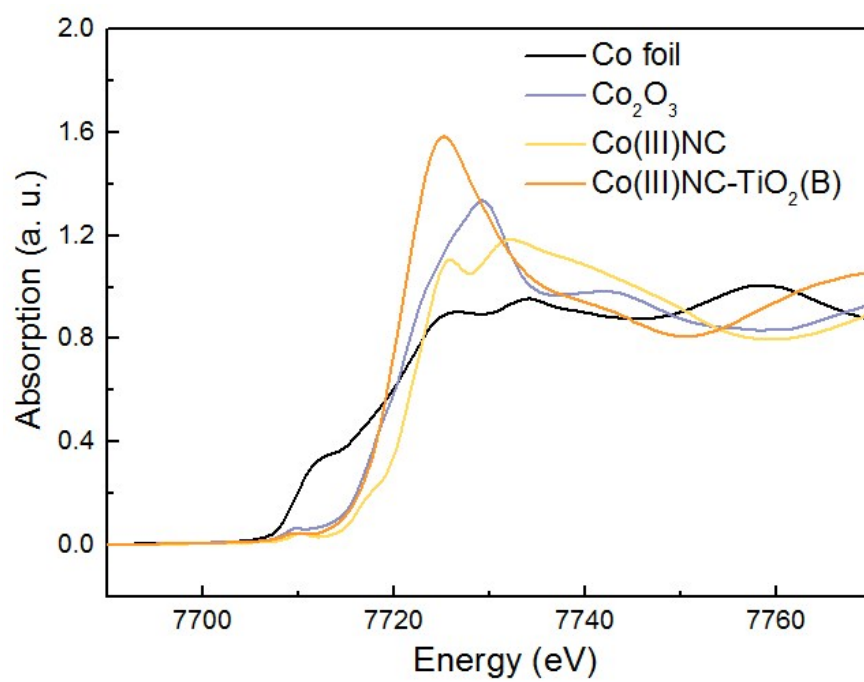

Figure S8. The overall profile of Co K-edge XANES spectra of Co(III)NC and Co(III)NC-TiO<sub>2</sub>(B) indicated the presence of trivalent Co.

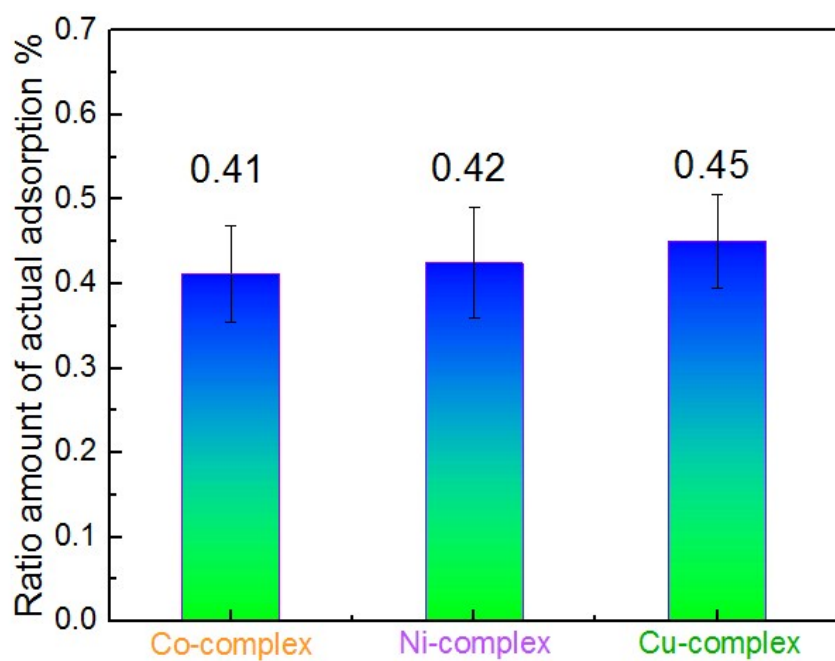

The variety of element under electrostatic adsorption

Figure S9. The actual adsorption ratio amounts of Co, Ni and Cu on TiO<sub>2</sub> (B) tested by ICP-OES.

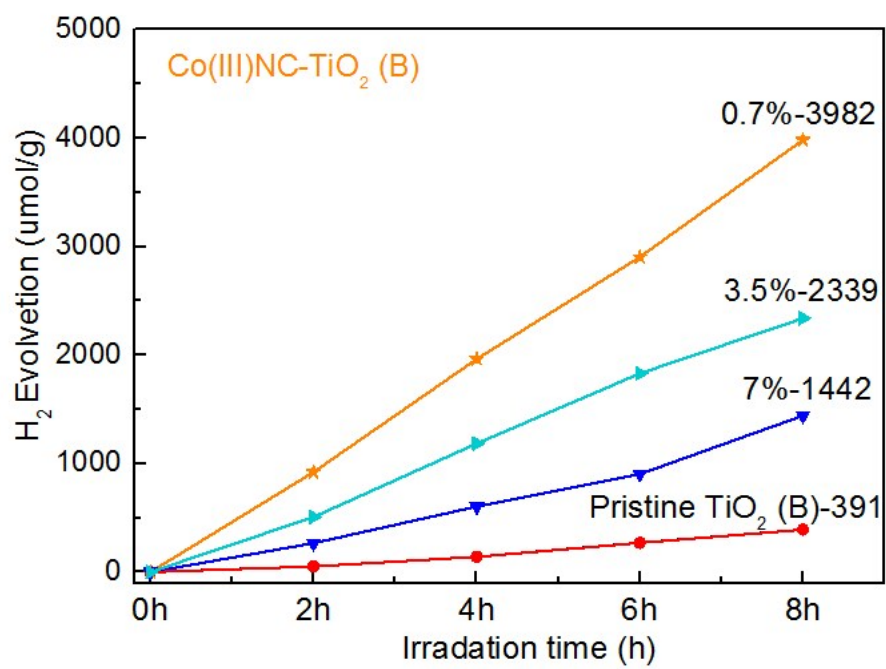

Figure S10. Photocatalytic H<sub>2</sub> evolution activities of Co(III)NC-TiO<sub>2</sub> (B) with different loading contents.

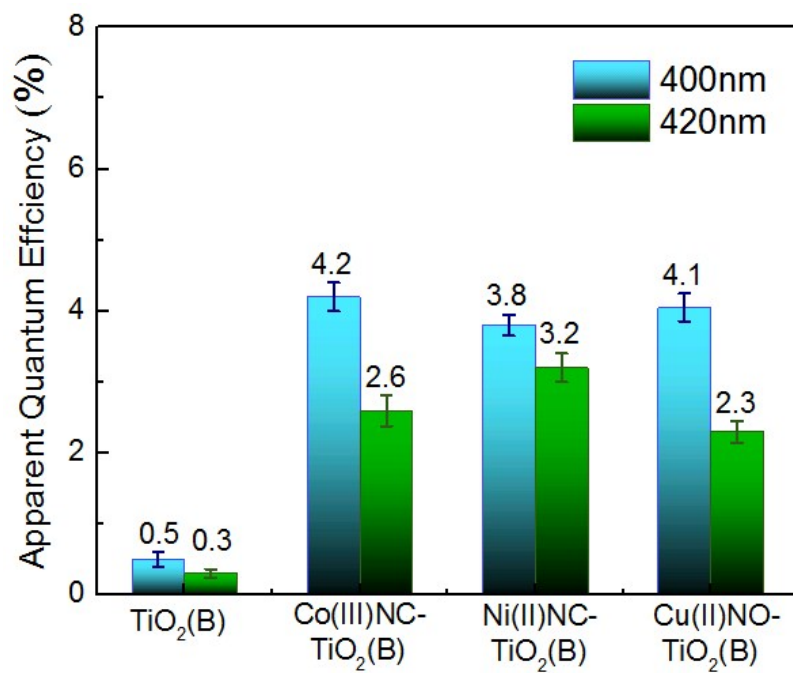

Figure S11. AQE of pristine TiO<sub>2</sub>(B), Co(III)NC-TiO<sub>2</sub>(B), Ni(II)NC-TiO<sub>2</sub>(B) and Cu(II)NO-TiO<sub>2</sub>(B) nanosheets at 400nm and 420nm.

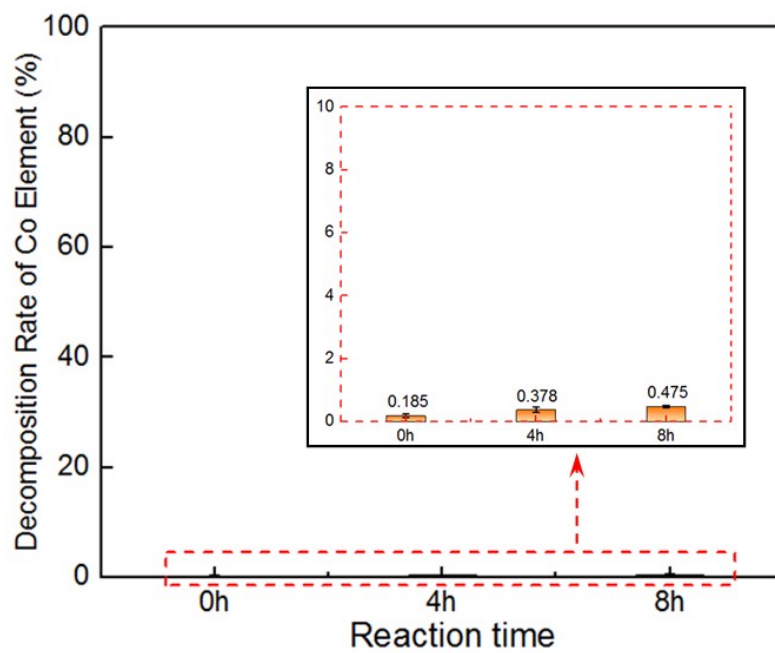

Figure S12. the decomposition rate of Co element with different photocatalytic reaction time

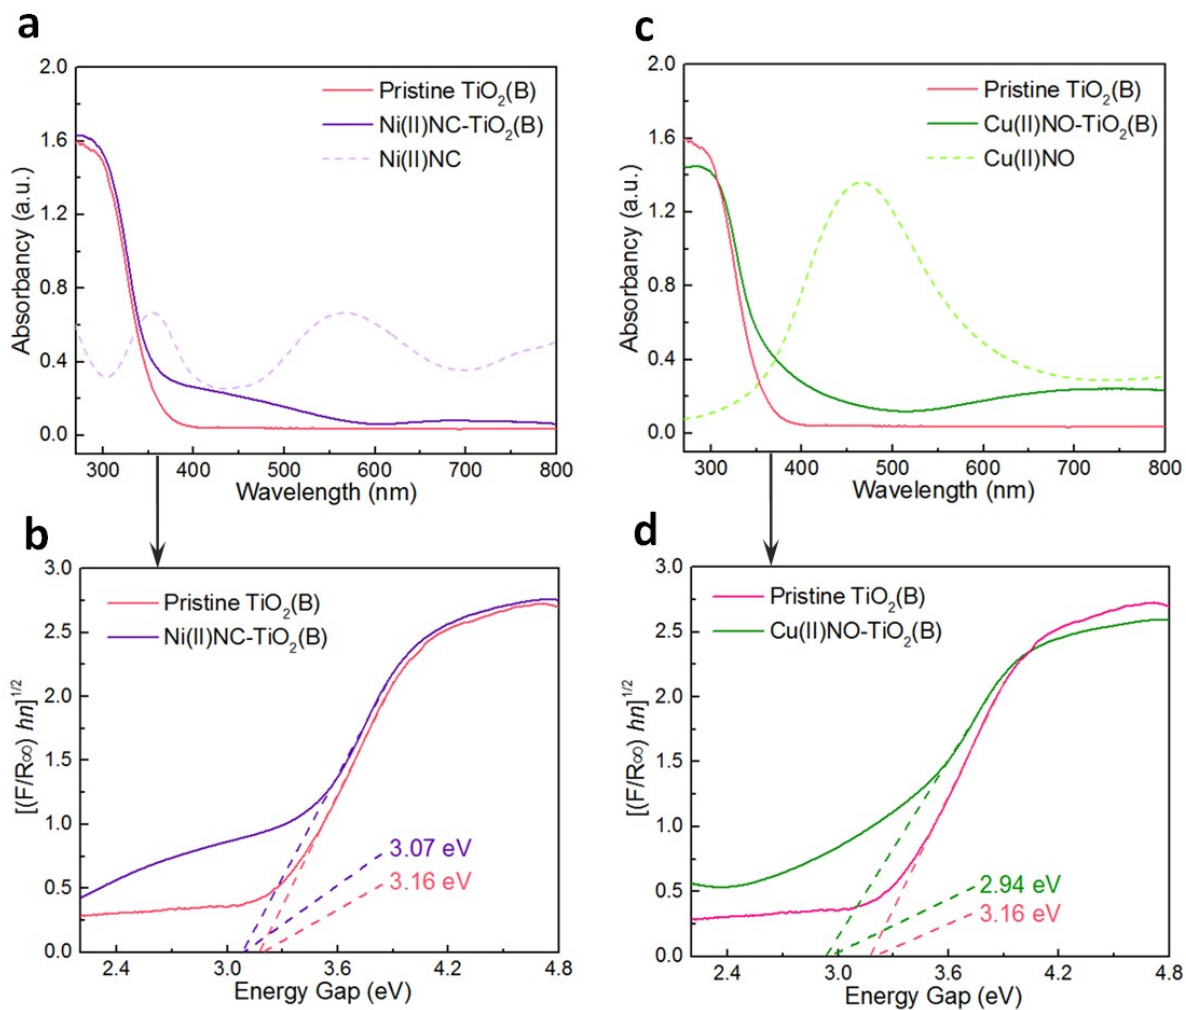

Figure S13. (a) UV-Vis diffuse reflectance spectra of pure  $\text{TiO}_2(\text{B})$ ,  $\text{Ni(II)NC-TiO}_2(\text{B})$  and  $\text{Ni(II)NC}$  and (b) transform of Kubelka-Munk function versus the energy of photon of  $\text{TiO}_2(\text{B})$ ,  $\text{Ni(II)NC-TiO}_2(\text{B})$ ; (c) UV-Vis diffuse reflectance spectra of pure  $\text{TiO}_2(\text{B})$ ,  $\text{Cu(II)NO-TiO}_2(\text{B})$  and  $\text{Cu(II)NO}$  and (d) transform of Kubelka-Munk function versus the energy of photon of  $\text{TiO}_2(\text{B})$ ,  $\text{Cu(II)NO-TiO}_2(\text{B})$ .

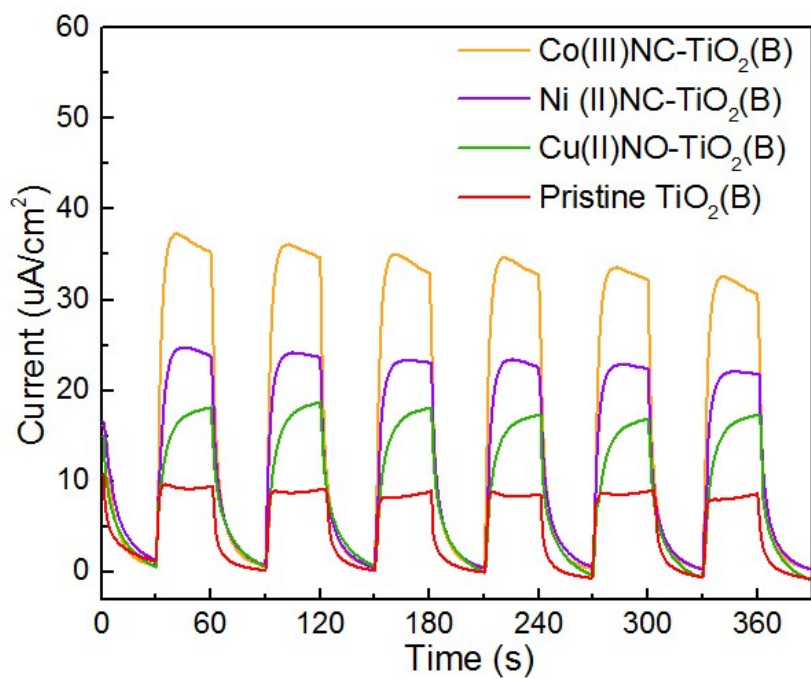

Figure S14. Transient photocurrent responses of Co(III)NC/Ni(II)NC/Cu(II)NO-TiO<sub>2</sub>(B) nanosheets using a bias potential of 0.6 V (vs. Ag/AgCl) under on-off cycling irradiation.

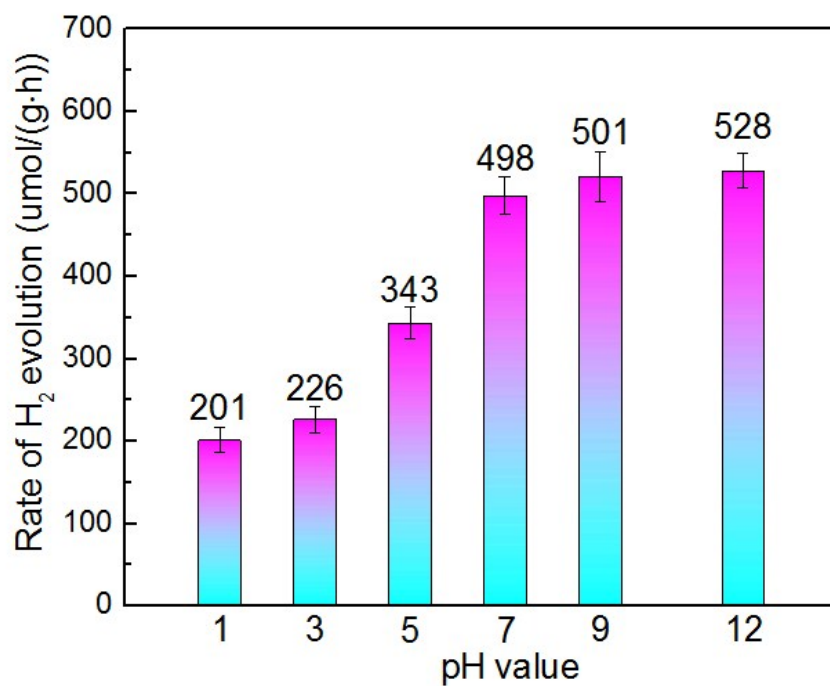

Figure S15. Photocatalytic H<sub>2</sub> evolution activities of Co(III)NC-TiO<sub>2</sub> (B) in aqueous methanol solution with different pH adjusted by dropping NH<sub>3</sub>·H<sub>2</sub>O solution.



Table S1 Photocatalytic H<sub>2</sub> evolution performance of TiO<sub>2</sub> materials

| Semiconductor                                       | Modification method                                      | Surface specific area   | H <sub>2</sub> evolution | Published time | references       |
|-----------------------------------------------------|----------------------------------------------------------|-------------------------|--------------------------|----------------|------------------|
| Fe <sub>2</sub> O <sub>3</sub> /TiO <sub>2</sub>    | Polycrystal mixed growth                                 | 28 m <sup>2</sup> /g    | 217.6 μmol/(g•h)         | 2014           | 1                |
| Ag/TiO <sub>2</sub>                                 | Photodeposition method                                   | 15 m <sup>2</sup> /g    | 220 μmol/(g•h)           | 2015           | 2                |
| Core–Shell TiO <sub>2</sub>                         | Hydrothermal treatment with hydrofluoric acid            | 1.6 m <sup>2</sup> /g   | 268.3 μmol/(g•h)         | 2016           | 3                |
| ZnTiO <sub>3</sub> /TiO <sub>2</sub>                | Hydrothermal treatment of zeolitic imidazolate framework | 132 m <sup>2</sup> /g   | 192.5 μmol/(g•h)         | 2017           | 4                |
| Branched TiO <sub>2</sub>                           | Alkali-hydrothermal method                               | 205.5 m <sup>2</sup> /g | 410 μmol/(g•h)           | 2017           | 5                |
| Au/TiO <sub>2</sub>                                 | Sol immobilization method                                | ---                     | 65 μmol/(g•h)            | 2018           | 6                |
| RGO/ TiO <sub>2</sub>                               | Sol–gel electrospinning method                           | 55 m <sup>2</sup> /g    | 149 μmol/(g•h)           | 2018           | 7                |
| Plasma TiO <sub>2</sub> (B)                         | Plasma engraving                                         | 515 m <sup>2</sup> /g   | 155 μmol/(g•h)           | 2018           | 8                |
| TiO <sub>2</sub> (B)-ZnO                            | Reflux method                                            | 23.3 m <sup>2</sup> /g  | 193 μmol/(g•h)           | 2018           | 9                |
| Au/TiO <sub>2</sub> –gC <sub>3</sub> N <sub>4</sub> | Sol–gel and chemical reduction                           | 75 m <sup>2</sup> /g    | 350 μmol/(g•h)           | 2018           | 10               |
| Pt- TiO <sub>2</sub> (B)                            | Photodeposition method                                   | 301 m <sup>2</sup> /g   | 869.4 μmol/(g•h)         |                | <b>This work</b> |
| Co(III)NC-TiO <sub>2</sub> (B)                      | Electrostatic adsorption                                 | 316 m <sup>2</sup> /g   | 497.8 μmol/(g•h)         |                | <b>This work</b> |
| Ni(II)NC-TiO <sub>2</sub> (B)                       | Electrostatic adsorption                                 | 309 m <sup>2</sup> /g   | 431.6 μmol/(g•h)         |                | <b>This work</b> |
| Cu(II)NO-TiO <sub>2</sub> (B)                       | Electrostatic adsorption                                 | 321 m <sup>2</sup> /g   | 364.6 μmol/(g•h)         |                | <b>This work</b> |

## References

1. K. Afroz, M. Moniruddin, N. Bakranov, S. Kudaibergenov and N. Nuraje, *J. Mater. Chem. A*, 2018, DOI: 10.1039/c8ta04165b.
2. Y. Choi, H.-i. Kim, G.-h. Moon, S. Jo and W. Choi, *ACS Catal.*, 2016, **6**, 821-828.
3. Y. Yang, G. Liu, J. T. Irvine and H. M. Cheng, *Adv. Mater.*, 2016, **28**, 5850-5856.
4. H. Tian, S. Wang, C. Zhang, J.-P. Veder, J. Pan, M. Jaroniec, L. Wang and J. Liu, *J. Mater. Chem. A*, 2017, **5**, 11615-11622.
5. G. Yang, L. Wang, S. Peng, J. Wang, D. Ji, W. Yan and S. Ramakrishna, *Small*, 2017, **13**.
6. J. Nie, J. Schneider, F. Sieland, L. Zhou, S. Xia and D. W. Bahnemann, *RSC Adv.*, 2018, **8**, 25881-25887.
7. D. Xu, L. Li, R. He, L. Qi, L. Zhang and B. Cheng, *Appl. Surf. Sci.*, 2018, **434**, 620-625.
8. X. Kong, Y. Xu, Z. Cui, Z. Li, Y. Liang, Z. Gao, S. Zhu and X. Yang, *Appl. Catal. B: Environ.*, 2018, **230**, 11-17.
9. C. Sun, Q. Xu, Y. Xie, Y. Ling and Y. Hou, *J. Mater. Chem. A*, 2018, **6**, 8289-8298.
10. C. Marchal, T. Cottineau, M. G. Méndez-Medrano, C. Colbeau-Justin, V. Caps and V. Keller, *Advanced Energy Mater.*, 2018, **8**, 1702142.
